# Supplementary material
Source: publisher figshare collection journal article supplement (https://acs.figshare.com/ndownloader/files/26141421)
Supplement: Supplementary file 1 [file 26141421]

# Supporting information

## **High-flux fine hollow fiber nanofiltration membrane for the purification of drinking water**

Peng Gao<sup>†</sup>, Sun-Jie Xu<sup>†</sup>, Zhen-Liang Xu<sup>\*</sup>, Ping Li, Yu-Zhe Wu, Lan-Qian Li, Hai-Zhen Zhang<sup>\*</sup>

State Key Laboratory of Chemical Engineering, Membrane Science and Engineering R&D  
Lab, Chemical Engineering Research Center, School of Chemical Engineering East China  
University of Science and Technology, 130 Meilong Road, Shanghai 200237, China

---

<sup>\*</sup> *To whom all correspondence should be addressed.*

Dr. Zhen-Liang Xu, E-mail: chemxuzl@ecust.edu.cn; Dr. Hai-Zhen Zhang, zhang120117@126.com;  
Tel: 86-21-64253670; Fax: 86-21-64252989.

<sup>†</sup> P. Gao and S. J. Xu contributed equally to this work.

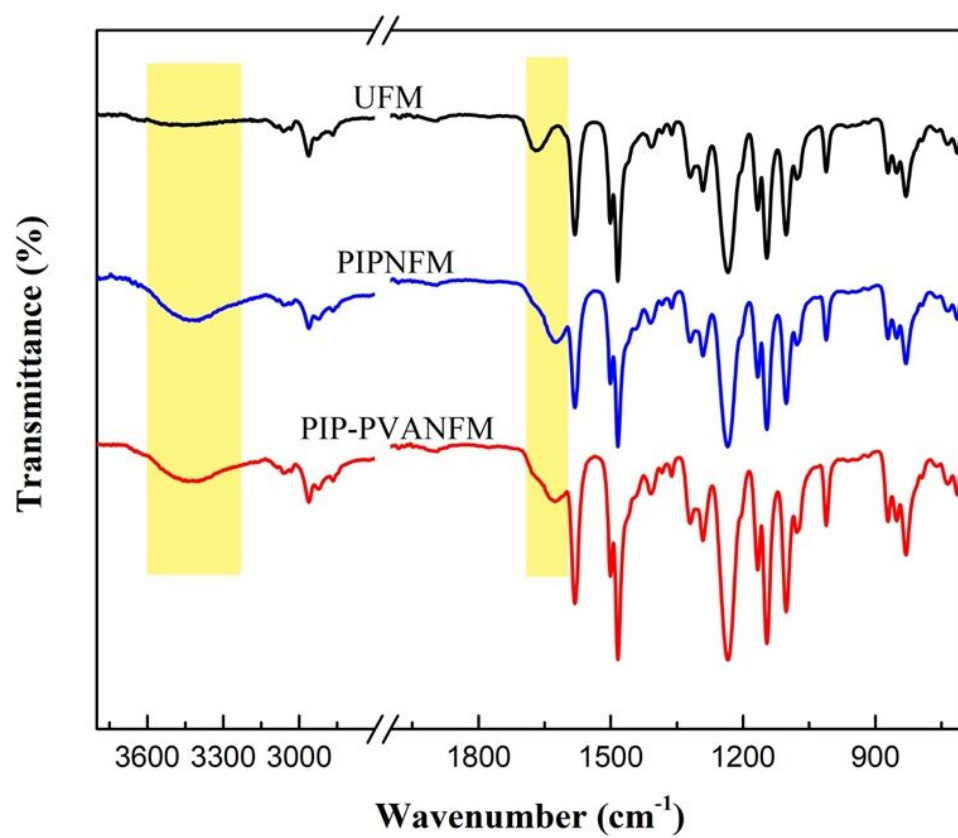

**Figure S1.** FT-IR spectra for UFM, PIPNFM and PIP-PVANFM over wave numbers of 3800-700  $\text{cm}^{-1}$ .

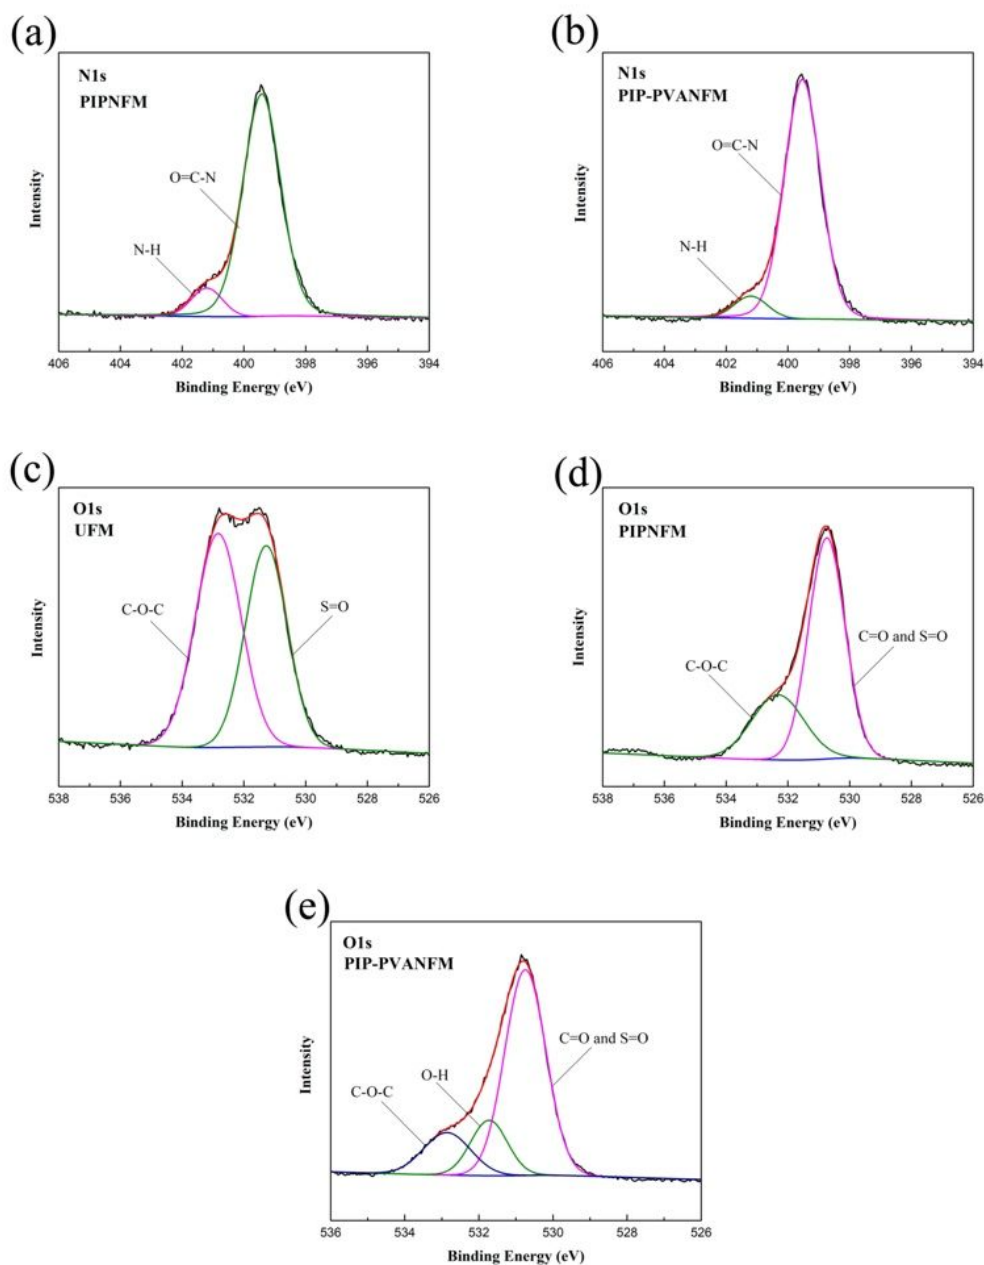

**Figure S2.** (a) N1s spectra of PIPNFM, (b) N1s spectra of PIP-PVANFM, (c) O1s spectra of UFM, (d) O1s spectra of PIPNFM, (e) O1s spectra of PIP-PVANFM.

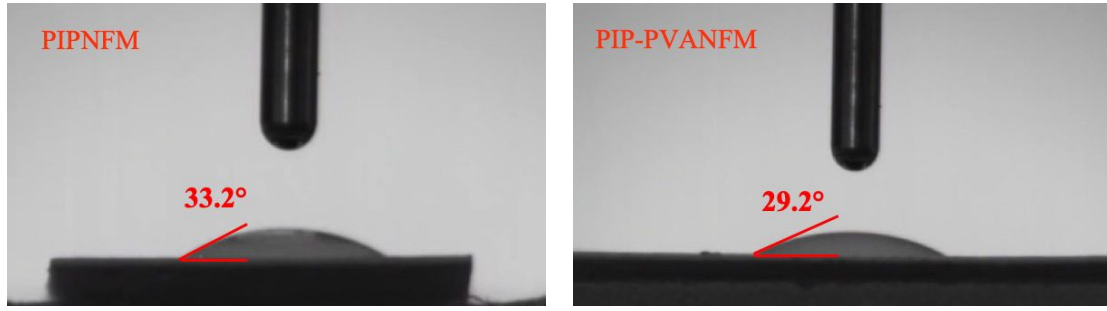

**Figure S3.** The water contact angle of PIPNFM and PIP-PVANFM.

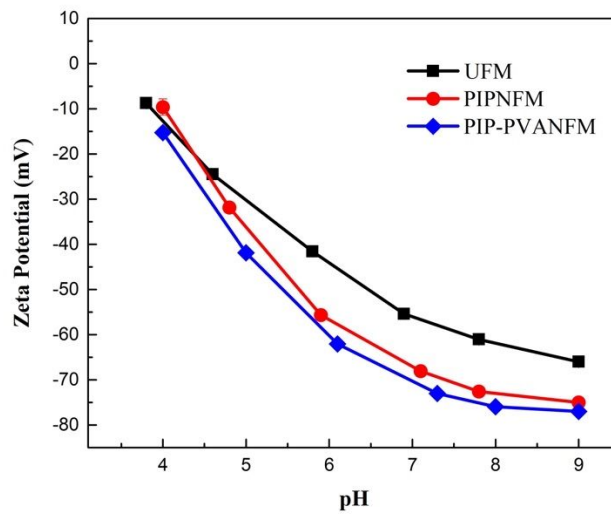

**Figure S4.** The zeta potential of UFM, PIPNFM and PIP-PVANFM.

Water/salt permeability selectivity was calculated by following equation<sup>[1]</sup>:

$$\frac{I}{A} = \frac{\Delta p - \Delta c_s RT}{J_w} \#(S1)$$

where  $\Delta p$  is the transmembrane pressure,  $\Delta c_s$  is the changes of salt concentration,  $R$  is the gas constant ( $83.1 \text{ cm}^3 \cdot \text{bar} \cdot \text{K}^{-1} \cdot \text{mol}^{-1}$ ),  $T$  is the operating temperature (K),  $J_w$  is the pure water flux ( $\text{L} \cdot \text{m}^{-2} \cdot \text{h}^{-1}$ ).

$$\frac{I}{B} = \frac{\Delta c_s}{J_s} \#(S2)$$

where  $J_s$  is the salt flux ( $\text{L} \cdot \text{m}^{-2} \cdot \text{h}^{-1}$ )

$$P_w = \frac{ALRT}{M_w} \#(S3)$$

where  $L$  is the thickness of PA layer,  $M_w$  is the molecular weight of water ( $\text{g}\cdot\text{mol}^{-1}$ )

$$P_s = B \times L \#(S4)$$

## References

- (1) Tan, Z.; Chen, S. F.; Peng, X. S.; Zhang, L.; Gao, C. J. Polyamide membranes with nanoscale Turing structures for water purification. *Science* **2018**, *360*, 518-521.
